# Supplementary material
Source: PubMed Central journal article supplement (PMC1189324)

**A**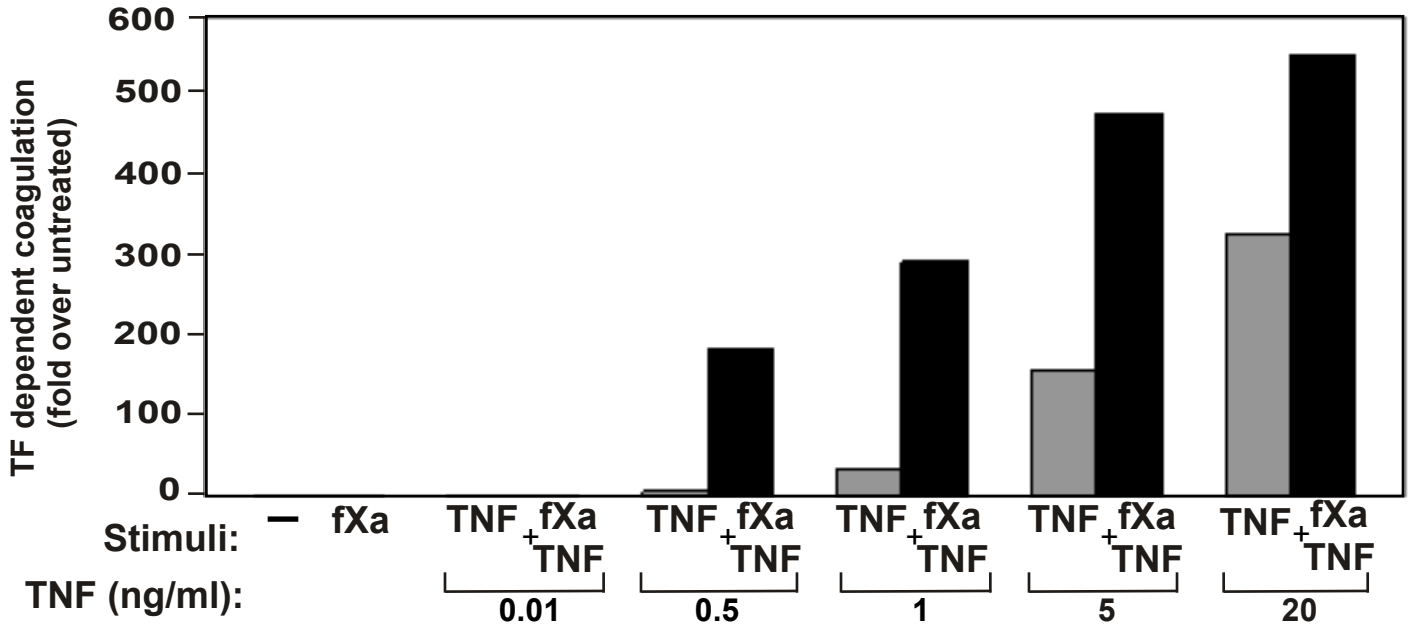**B**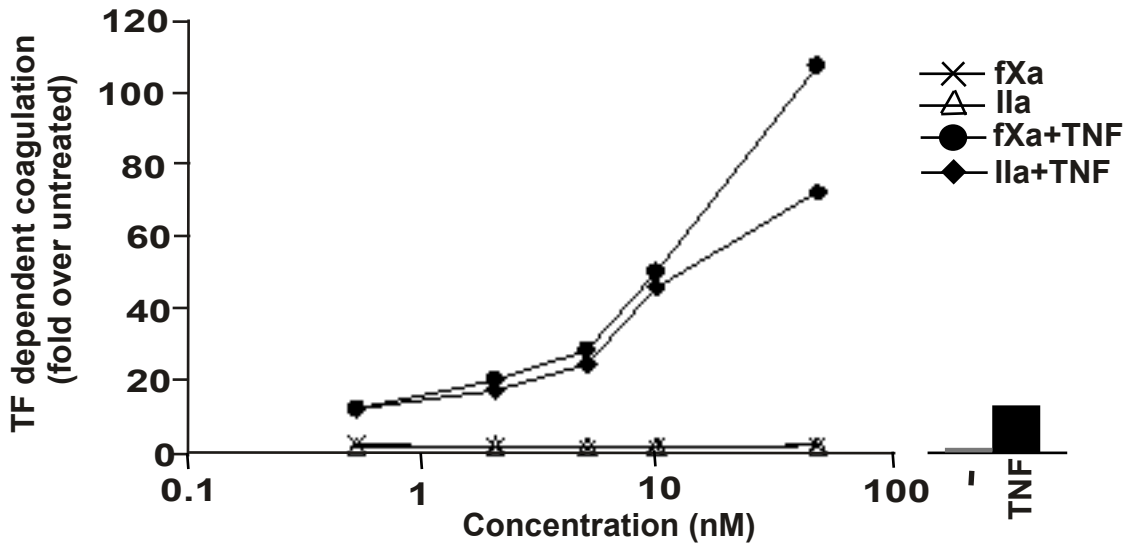

Supplement: pnas_0504526102_1.pdf [file pnas_0504526102_1.pdf]

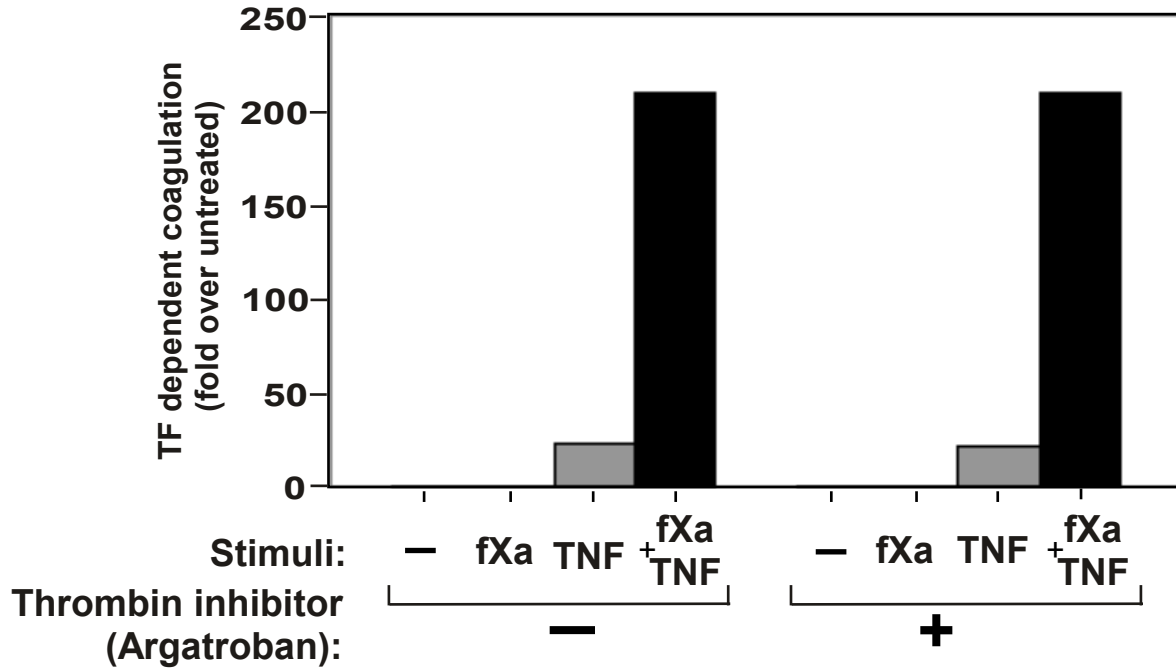

Supplement: pnas_0504526102_3.pdf [file pnas_0504526102_3.pdf]
